# Supplementary material
Source: Research Square preprint supplement (doi:10.21203/rs.3.rs-8820742/v1)
Supplement: Supplementary file 1 [file 628f063e2629c08358afe36c.docx]

| **Table Hosmer-Lemeshow Test Results** | | | | |
| --- | --- | --- | --- | --- |
| Metric | Training set *x²* | Training set *P*-value | Test set *x²* | Test set *P*-value |
| Clinical (Ki-67) | 2.838 | 0.944 | 2.328 | 0.969 |
| Arterial phase | 5.841 | 0.665 | 6.020 | 0.645 |
| Venous phase | 3.527 | 0.897 | 4.380 | 0.821 |
| Delta-Relative | 2.134 | 0.977 | 11.318 | 0.184 |
| Delta-Absolute | 4.185 | 0.840 | 4.638 | 0.796 |
| Nomogram | 1.136 | 0.997 | 9.040 | 0.339 |
