# Supplementary material
Source: Research Square preprint supplement (doi:10.21203/rs.3.rs-8820742/v1)
Supplement: Supplementary file 2 [file 94304b0c2bef22d411dc318e.docx]

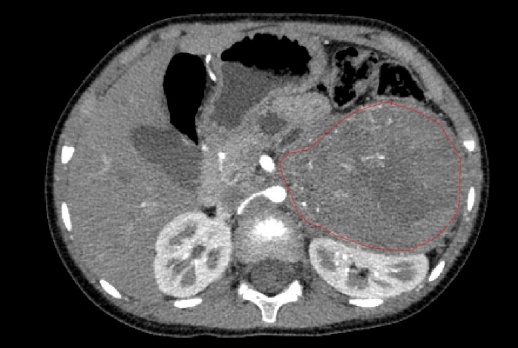

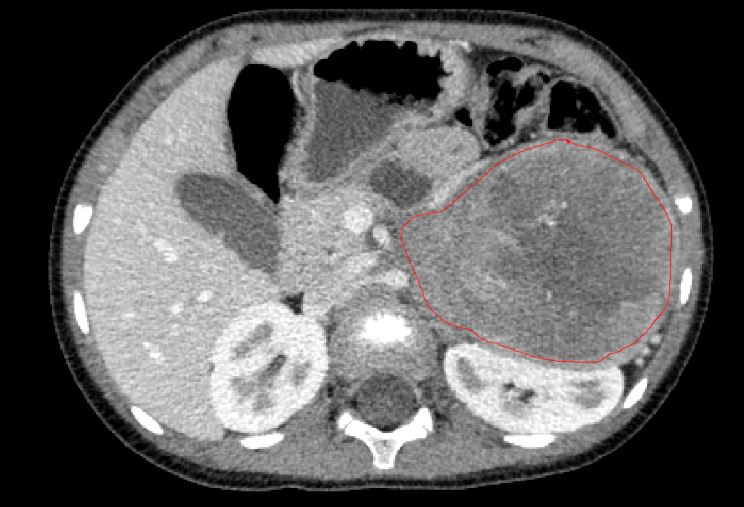

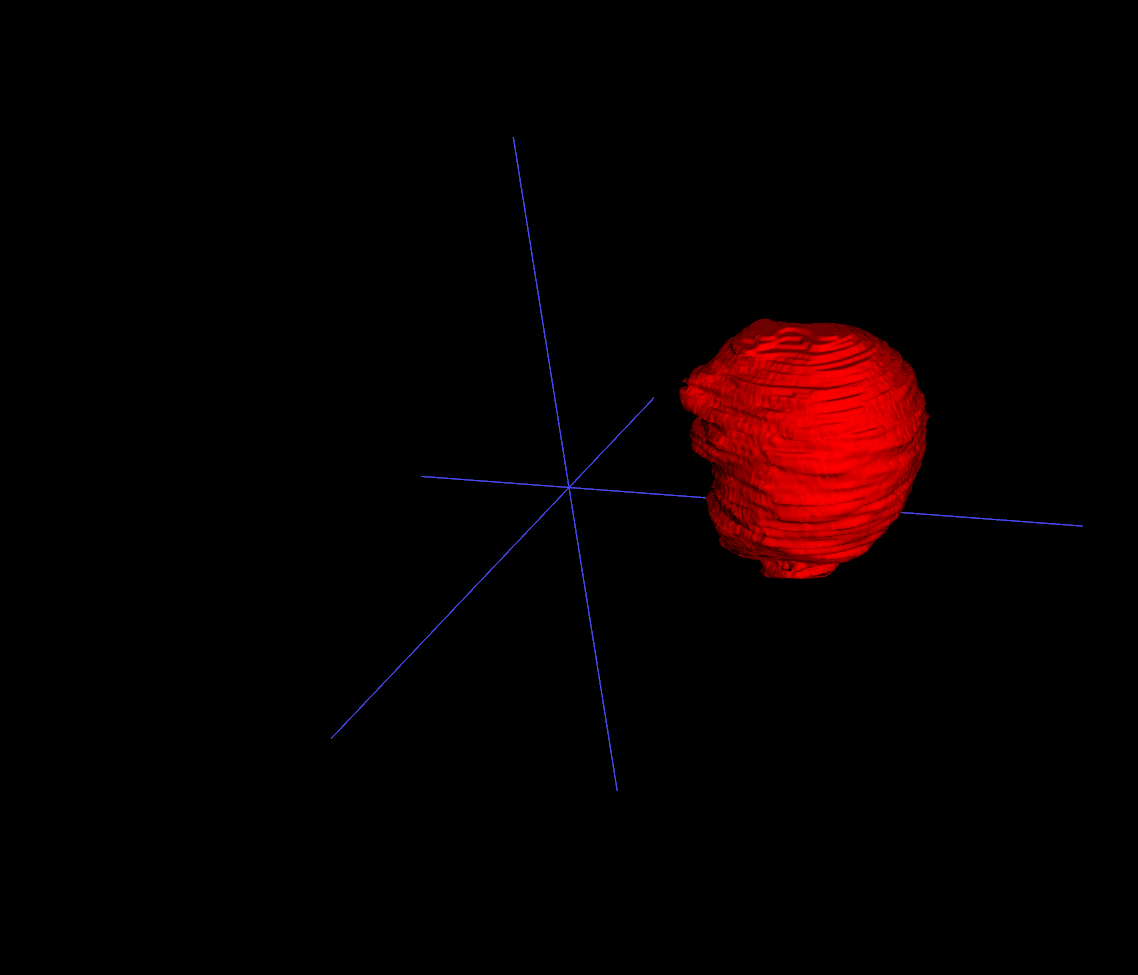


c

b

a

3D Segmentation Schematic of NB. (a) Manual slice-by-slice delineation of tumor-edge ROI on arterial-phase CT images. (b) Slice-by-slice delineation of tumor-edge ROI on venous-phase CT images. (c) 3D ROI of the tumor.
