# Supplementary material
Source: Research Square preprint supplement (doi:10.21203/rs.3.rs-8820742/v1)
Supplement: Supplementary file 3 [file f3a67fcb978f8f1ae754f3d5.docx]

| **Optimal Radiomics Features and Feature Coefficients of the Four Models** | | |
| --- | --- | --- |
| **Model** | **Feature Names** | **Feature Coefficients** |
| **Arterial phase**  **（22）** | | original_shape_Maximum3DDiameter | | --- | | wavelet-LHH_glszm_SizeZoneNonUniformity | | wavelet-LHL_glszm_GrayLevelNonUniformity | | square_firstorder_Energy | | wavelet-LHL_glszm_ZoneEntropy | | original_shape_Sphericity | | wavelet-LLH_glcm_MaximumProbability | | wavelet-HHL_glszm_GrayLevelNonUniformity | | wavelet-HHH_firstorder_Energy | | wavelet-LHH_glszm_SmallAreaLowGrayLevelEmphasis | | wavelet-LLH_glszm_SmallAreaLowGrayLevelEmphasis | | wavelet-LLH_glszm_GrayLevelNonUniformityNormalized | | wavelet-HHL_glszm_SmallAreaLowGrayLevelEmphasis | | wavelet-LHL_gldm_DependenceVariance | | lbp-2D_firstorder_10Percentile | | wavelet-HHH_glszm_GrayLevelVariance | | wavelet-HLL_glcm_Autocorrelation | | wavelet-LLH_glcm_ClusterShade | | wavelet-HHH_glcm_SumEntropy | | wavelet-HHH_glcm_Autocorrelation | | wavelet-LHH_firstorder_Maximum | | wavelet-LLL_firstorder_RootMeanSquared | | | 0.005506081 | | --- | | 0.004510806 | | 0.001625389 | | 0.060014293 | | 0.005786211 | | -0.10776095 | | -0.044312268 | | 0.005305098 | | 0.036835346 | | 0.047542103 | | 0.002830213 | | -0.011726352 | | 0.018044794 | | 0.018014939 | | -0.024754761 | | -0.00485714 | | 0.004546346 | | -0.008215833 | | -0.015095153 | | -0.030021844 | | 0.007176714 | | 0.036885572 | |
| **Venous phase**  **（18）** | | original_shape_Maximum3DDiameter | | --- | | square_firstorder_Energy | | original_shape_LeastAxisLength | | original_shape_Sphericity | | wavelet-LHH_glszm_SizeZoneNonUniformity | | wavelet-LLH_glcm_MaximumProbability | | wavelet-LLH_glszm_GrayLevelNonUniformityNormalized | | wavelet-LLL_glrlm_LongRunLowGrayLevelEmphasis | | wavelet-HHH_firstorder_Energy | | wavelet-LLH_glcm_ClusterShade | | wavelet-HLH_gldm_LargeDependenceLowGrayLevelEmphasis | | wavelet-HHH_glszm_GrayLevelNonUniformity | | exponential_firstorder_10Percentile | | wavelet-HHH_firstorder_Maximum | | wavelet-HHL_glszm_SizeZoneNonUniformityNormalized | | wavelet-HHH_glszm_SizeZoneNonUniformity | | wavelet-HHH_gldm_HighGrayLevelEmphasis | | wavelet-HLH_firstorder_Uniformity | | | 0.04707381 | | --- | | 0.059841201 | | 0.001039577 | | -0.107725298 | | 0.019945474 | | -0.001139855 | | -0.028431767 | | 0.01684965 | | 0.03079476 | | -0.020105135 | | -0.01559778 | | -0.006287802 | | 0.047263516 | | 0.01252083 | | 0.003833141 | | -0.025184266 | | -0.038776759 | | -0.001764458 | |
| **Delta-Absolute**  **（28）** | | wavelet-HHL_glszm_SizeZoneNonUniformity | | --- | | wavelet-LLH_gldm_SmallDependenceEmphasis | | lbp-3D-m1_firstorder_Kurtosis | | wavelet-HHL_glrlm_LongRunHighGrayLevelEmphasis | | lbp-3D-k_glszm_GrayLevelNonUniformity | | wavelet-LHL_gldm_HighGrayLevelEmphasis | | wavelet-LHH_glszm_SizeZoneNonUniformity | | wavelet-HLL_glszm_SizeZoneNonUniformity | | wavelet-HLH_glrlm_RunVariance | | wavelet-HHH_glrlm_ShortRunHighGrayLevelEmphasis | | wavelet-LHH_glszm_ZonePercentage | | wavelet-LLH_glrlm_ShortRunHighGrayLevelEmphasis | | wavelet-HHL_glrlm_RunVariance | | wavelet-HLH_gldm_DependenceNonUniformityNormalized | | wavelet-HLL_glszm_LargeAreaHighGrayLevelEmphasis | | wavelet-LHL_glszm_SizeZoneNonUniformity | | wavelet-HLL_glszm_GrayLevelNonUniformityNormalized | | original_gldm_LargeDependenceEmphasis | | original_glrlm_RunEntropy | | original_gldm_DependenceNonUniformityNormalized | | wavelet-HHL_firstorder_Maximum | | wavelet-LHL_glrlm_RunVariance | | lbp-3D-m2_firstorder_Maximum | | wavelet-HLL_glszm_SmallAreaLowGrayLevelEmphasis | | wavelet-LLH_glrlm_LongRunLowGrayLevelEmphasis | | wavelet-LHH_glszm_ZoneEntropy | | wavelet-HHL_glszm_GrayLevelVariance | | wavelet-LLH_firstorder_Skewness | | | 0.055874889 | | --- | | -0.02949616 | | -0.021852168 | | -0.011941944 | | 0.027141693 | | -0.016284139 | | 0.009171701 | | 0.0033373 | | -0.017126955 | | -0.004604557 | | -0.008957049 | | -0.031263735 | | -0.011443763 | | -0.00530002 | | 0.00410865 | | 0.005437684 | | -0.018237075 | | -0.029510094 | | -0.016133285 | | -0.00457389 | | 0.042676702 | | -0.011182255 | | -0.021123452 | | -0.023014958 | | -0.010521719 | | -0.015156437 | | 0.017350971 | | 0.021645535 | |
| **Delta-Relative**  **（30）**  **Delta-Relative**  **（30）** | | wavelet-LLH_gldm_SmallDependenceEmphasis | | --- | | wavelet-LHL_gldm_HighGrayLevelEmphasis | | wavelet-LHL_gldm_DependenceVariance | | wavelet-HLH_glrlm_RunVariance | | wavelet-HHL_glszm_SizeZoneNonUniformity | | wavelet-HHH_glrlm_ShortRunHighGrayLevelEmphasis | | wavelet-LLH_gldm_DependenceNonUniformity | | wavelet-HLH_gldm_DependenceNonUniformityNormalized | | wavelet-HHH_glrlm_LongRunLowGrayLevelEmphasis | | wavelet-HHH_glcm_Imc2 | | wavelet-LLH_glszm_LargeAreaLowGrayLevelEmphasis | | wavelet-LLH_glrlm_ShortRunHighGrayLevelEmphasis | | original_gldm_LargeDependenceEmphasis | | wavelet-LLH_glszm_GrayLevelVariance | | wavelet-LLH_glszm_GrayLevelNonUniformityNormalized | | original_glrlm_ShortRunEmphasis | | lbp-3D-m2_firstorder_Maximum | | wavelet-HHL_firstorder_Maximum | | wavelet-HLH_glszm_LargeAreaEmphasis | | wavelet-LLL_firstorder_Range | | wavelet-LHH_glszm_ZonePercentage | | wavelet-HHL_firstorder_Range | | wavelet-LLH_firstorder_Median | | wavelet-LLL_glszm_GrayLevelVariance | | wavelet-LLH_glszm_SizeZoneNonUniformity | | wavelet-LHL_glszm_ZonePercentage | | original_shape_Maximum2DDiameterColumn | | wavelet-LHL_glszm_GrayLevelNonUniformity | | wavelet-LLL_glszm_ZoneEntropy | | wavelet-HHH_glszm_SmallAreaHighGrayLevelEmphasis | | | -0.020961925 | | --- | | -0.025250911 | | -0.024243728 | | -0.008521157 | | 0.05353123 | | -0.021332889 | | -0.024272996 | | -0.017160562 | | -0.005238305 | | -0.024139864 | | -0.023101474 | | -0.022972087 | | -0.015664084 | | -0.002556633 | | -0.008446323 | | -0.026802812 | | -0.045147119 | | 0.022882934 | | -0.020855617 | | 0.047943204 | | -0.0450565 | | 0.036337475 | | 0.043366086 | | -0.033007834 | | -0.024161489 | | -0.003716182 | | -0.013452262 | | -0.012824038 | | -0.018442074 | | -0.027346292 | |
